CORRECTION

# Correction: A *d* factor? Understanding trait distractibility and its relationships with ADHD symptomatology and hyperfocus

Han Zhang, Akira Miyake, Jahla Osborne, Priti Shah, John Jonides

The Funding statement for this article is incorrect. The correct Funding statement is as follows: This work was supported by the National Science Foundation [grant number: 2238151] awarded to the University of Michigan with JJ as Principal Investigator and the National Institute of Mental Health (Unique Federal Award Identification Number (FAIN): R21MH129909) awarded to the University of Michigan with JJ as Principal Investigator. The funders had no role in study design, data collection and analysis, decision to publish, or preparation of the manuscript.

## Reference

1. Zhang H, Miyake A, Osborne J, Shah P, Jonides J. A *d* factor? Understanding trait distractibility and its relationships with ADHD symptomatology and hyperfocus. PLoS One. 2023;18(10):e0292215. <https://doi.org/10.1371/journal.pone.0292215> PMID: [37878578](https://pubmed.ncbi.nlm.nih.gov/37878578/)

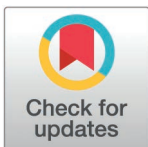

## OPEN ACCESS

**Citation:** Zhang H, Miyake A, Osborne J, Shah P, Jonides J (2025) Correction: A *d* factor? Understanding trait distractibility and its relationships with ADHD symptomatology and hyperfocus. PLoS One 20(9): e0332258. <https://doi.org/10.1371/journal.pone.0332258>

**Published:** September 11, 2025

**Copyright:** © 2025 Zhang et al. This is an open access article distributed under the terms of the [Creative Commons Attribution License](https://creativecommons.org/licenses/by/4.0/), which permits unrestricted use, distribution, and reproduction in any medium, provided the original author and source are credited.
